# Supplementary material
Source: PubMed Central journal article supplement (PMC4243071)
Supplement: peds.2014-2132_peds.2014-2132SupplementaryData.pdf [file peds.2014-2132_peds.2014-2132SupplementaryData.pdf]

## Supplemental Information

**SUPPLEMENTAL TABLE 2** Prolonged Presence of Rhinovirus RNA: Strain and Viral Load Data

| Case Number and Specimen Collection Date | Cumulative Days        | Symptoms | Rhinovirus Type | Rhinovirus RNA Load, log <sub>10</sub> Copies/mL | Additional Respiratory Virus(es) Detected <sup>a</sup> |
|------------------------------------------|------------------------|----------|-----------------|--------------------------------------------------|--------------------------------------------------------|
| <b>Case 1</b>                            |                        |          |                 |                                                  |                                                        |
| November 18, 2009                        | 0                      | N        | 76 <sup>b</sup> | 6.64                                             |                                                        |
| December 14, 2009                        | 26                     | Y        | Neg             |                                                  |                                                        |
| December 18, 2009                        | 30                     | Y        | Pos/ND          | 2.57                                             |                                                        |
| January 11, 2010                         | 54                     | Y        | 76 <sup>b</sup> | 10.43                                            | CoV 229E                                               |
| January 13, 2010                         | 56                     | Y        | 76 <sup>b</sup> | ND                                               | CoV 229E                                               |
| February 10, 2010                        | 84                     | N        | Neg             |                                                  |                                                        |
| March 24, 2010                           | 126                    | N        | 2               | 6.30                                             |                                                        |
| <b>Case 2</b>                            |                        |          |                 |                                                  |                                                        |
| December 10, 2009                        | 0                      | N        | C <sup>b</sup>  | 3.57                                             | CoV 229E                                               |
| January 13, 2010                         | 34                     | N        | Neg             |                                                  |                                                        |
| February 5, 2010                         | 57                     | Y        | C <sup>b</sup>  | 7.55                                             | CoV 229E                                               |
| March 9, 2010                            | 89                     | N        | Neg             |                                                  |                                                        |
| April 6, 2010                            | 117                    | N        | Neg             |                                                  |                                                        |
| May 19, 2010                             | 160                    | N        | Neg             |                                                  |                                                        |
| <b>Case 3</b>                            |                        |          |                 |                                                  |                                                        |
| February 4, 2010                         | 0                      | N        | A               | 3.22                                             |                                                        |
| March 9, 2010                            | 33                     | N        | Neg             |                                                  | CoV NL63                                               |
| April 12, 2010                           | 67                     | Y        | Neg             |                                                  |                                                        |
| April 13, 2010                           | 68                     | Y        | 95              | 9.16                                             |                                                        |
| Apr 21, 2010                             | 76 (8 <sup>c</sup> )   | Y        | 95              | 9.01                                             |                                                        |
| May 14, 2010                             | 99                     | Y        | 54 <sup>b</sup> | 7.19                                             | Ad                                                     |
| June 23, 2010                            | 139                    | Y        | 33              | 4.98                                             | Ad; EV                                                 |
| July 19, 2010                            | 165 (66 <sup>c</sup> ) | N        | 54 <sup>b</sup> | ND                                               |                                                        |
| <b>Case 4</b>                            |                        |          |                 |                                                  |                                                        |
| March 16, 2010                           | 0                      | N        | Neg             |                                                  |                                                        |
| April 8, 2010                            | 23                     | Y        | A               | 7.98                                             | Ad                                                     |
| May 14, 2010                             | 59                     | N        | Neg             |                                                  | CoV OC43                                               |
| June 7, 2010                             | 83                     | Y        | Neg             |                                                  | BoV                                                    |
| June 15, 2010                            | 91                     | N        | Neg             |                                                  | BoV                                                    |
| July 13, 2010                            | 119                    | N        | 30 <sup>b</sup> | 4.70                                             |                                                        |
| August 13, 2010                          | 150 (31 <sup>c</sup> ) | N        | 30 <sup>b</sup> | ND                                               |                                                        |
| <b>Case 5</b>                            |                        |          |                 |                                                  |                                                        |
| April 9, 2010                            | 0                      | N        | Neg             |                                                  |                                                        |
| May 6, 2010                              | 27                     | N        | Neg             |                                                  |                                                        |
| June 15, 2010                            | 67                     | N        | C               | 4.31                                             |                                                        |
| July 15, 2010                            | 97                     | N        | A               | 5.26                                             | CoV NL63                                               |
| August 10, 2010                          | 123                    | Y        | 71 <sup>b</sup> | 3.93                                             | EV <sup>d</sup>                                        |
| August 11, 2010                          | 124                    | Y        | Neg             |                                                  |                                                        |
| September 14, 2010                       | 158                    | Y        | Neg             |                                                  |                                                        |
| September 20, 2010                       | 164 (41 <sup>c</sup> ) | Y        | 71 <sup>b</sup> | 7.02                                             | EV <sup>d</sup>                                        |
| <b>Case 6</b>                            |                        |          |                 |                                                  |                                                        |
| March 1, 2011                            | 0                      | N        | Neg             |                                                  |                                                        |
| March 30, 2011                           | 29                     | Y        | A               | 5.19                                             | hMPV                                                   |
| April 1, 2011                            | 31 (2 <sup>c</sup> )   | Y        | A               | ND                                               |                                                        |
| May 3, 2011                              | 63                     | Y        | Neg             |                                                  | CoV NL63                                               |
| May 9, 2011                              | 69                     | Y        | 89              | 3.29                                             | CoV NL63                                               |
| May 30, 2011                             | 90                     | N        | C <sup>b</sup>  | 0.65                                             |                                                        |
| June 30, 2011                            | 121                    | N        | 77              | ND                                               |                                                        |
| July 28, 2011                            | 149 (59 <sup>c</sup> ) | N        | C <sup>b</sup>  | ND                                               | PIV1                                                   |
| October 26, 2011                         | 239                    | N        | Neg             |                                                  | BoV                                                    |

**SUPPLEMENTAL TABLE 2** Continued

| Case Number and Specimen Collection Date | Cumulative Days        | Symptoms | Rhinovirus Type | Rhinovirus RNA Load, log <sub>10</sub> Copies/mL | Additional Respiratory Virus(es) Detected <sup>a</sup> |
|------------------------------------------|------------------------|----------|-----------------|--------------------------------------------------|--------------------------------------------------------|
| <b>Case 7</b>                            |                        |          |                 |                                                  |                                                        |
| December 20, 2011                        | 0                      | N        | Neg             |                                                  |                                                        |
| January 19, 2012                         | 30                     | N        | 30 <sup>b</sup> | 5.35                                             |                                                        |
| March 1, 2012                            | 72                     | N        | Neg             |                                                  | CoV NL63                                               |
| March 22, 2012                           | 93                     | N        | Neg             |                                                  |                                                        |
| April 19, 2012                           | 121 (91 <sup>c</sup> ) | N        | 30 <sup>b</sup> | 2.84                                             | CoV NL63; PIV1                                         |
| May 15, 2012                             | 147                    | N        | Neg             |                                                  |                                                        |
| August 17, 2012                          | 241                    | N        | Neg             |                                                  |                                                        |
| <b>Case 8</b>                            |                        |          |                 |                                                  |                                                        |
| January 26, 2012                         | 0                      | Y        | 24 <sup>b</sup> | ND                                               |                                                        |
| January 27, 2012                         | 1                      | Y        | 24 <sup>b</sup> | 7.49                                             |                                                        |
| February 23, 2012                        | 28                     | N        | Neg             |                                                  | CoV OC43                                               |
| March 20, 2012                           | 54                     | N        | 24 <sup>b</sup> | 6.21                                             | CoV NL63                                               |
| April 24, 2012                           | 89                     | Y        | 30              | ND                                               | EV <sup>d</sup>                                        |
| April 25, 2012                           | 90                     | Y        | 30              | 5.07                                             | EV <sup>d</sup>                                        |
| May 16, 2012                             | 111 (22 <sup>c</sup> ) | N        | 30              | 3.52                                             | EV <sup>d</sup>                                        |
| June 1, 2012                             | 127                    | Y        | Neg             |                                                  | CoV NL63                                               |
| June 28, 2012                            | 154                    | N        | Neg             |                                                  |                                                        |

Ad, adenovirus; BoV, bocavirus; CoV, coronavirus; EV, enterovirus; hMPV, human metapneumovirus; ND, not done; N, no; Neg, negative for rhinovirus by qRT-PCR; PIV1, parainfluenzavirus 1; Pos, positive for rhinovirus by qRT-PCR; Y, yes.

<sup>a</sup> PCR methods previously described.<sup>15</sup>

<sup>b</sup> Rhinovirus strains present >30 days.

<sup>c</sup> Cumulative days of presence of the same rhinovirus strain.

<sup>d</sup> Sequencing identified rhinovirus.
